# Supplementary material for: Hatchability and Survival of Lamproglena clariae Fryer, 1956 Exposed to Increasing Concentrations of Aqueous Aluminium
Source: MDPI journal article supplement (doi:10.3390/app13042145), 2023-02-07
Supplement: s1 [file s1]

Archive with 1 entries (1 files):
- applsci-2086584-supplementary.pdf
